# Supplementary material
Source: publisher figshare collection journal article supplement (https://acs.figshare.com/ndownloader/files/4136881)
Supplement: Supplementary file 1 [file 4136881]

**Supporting Information**

**Pressure-Induced Crystal Structure and Spin-State Transitions in  
Magnetite ( $\text{Fe}_3\text{O}_4$ )**

Sheng Ju,<sup>1,\*</sup> Tian-Yi Cai,<sup>1</sup> Hai-Shuang Lu,<sup>1</sup> and Chang-De Gong<sup>2,3</sup>

<sup>1</sup> *Department of Physics and Jiangsu Key Laboratory of Thin Films,  
Soochow University, Suzhou 215006, P. R. China*

<sup>2</sup> *Center for Statistical and Theoretical Condensed  
Matter Physics and Department of Physics,  
Zhejiang Normal University, Jinhua 321004, P. R. China*

<sup>3</sup> *National Laboratory of Solid State Microstructure and Department of Physics,  
Nanjing University, Nanjing 210093, P. R. China*

*\* Corresponding Author jusheng@suda.edu.cn*

1. Detailed lattice constants and atomic coordinate parameters for the nine typical samples. Table I for  $Fd\bar{3}m$  phase. Table II and Table III for  $Pbcm$  phase. Table IV and Table V for  $Bbmm$  phase.

2. Orbital resolved density of states for the nine typical samples. Figure 1 for A-site Fe and Figure 2 for B-site Fe.

TABLE I: Lattice constant ( $\text{\AA}$ ) and atomic coordinate parameter of  $\text{Fe}_3\text{O}_4$  (sample I, sample II, and sample III) with the space group  $Fd\bar{3}m$ .

| Sample | I      | II     | III    |
|--------|--------|--------|--------|
| $a$    | 8.4018 | 8.2333 | 8.0415 |
| $u$    | 0.2546 | 0.2545 | 0.2544 |

TABLE II: Lattice constant ( $\text{\AA}$ ) of  $\text{Fe}_3\text{O}_4$  (sample IV, sample V, and sample VI) with the space group  $Pbcm$ .

| Sample | IV      | V       | VI      |
|--------|---------|---------|---------|
| $a$    | 2.64872 | 2.59084 | 2.55332 |
| $b$    | 9.31928 | 9.10468 | 9.00087 |
| $c$    | 9.37144 | 9.20406 | 9.12054 |

TABLE III: Atomic coordinates  $(x,y,z)$  of  $\text{Fe}_3\text{O}_4$  (sample IV, sample V, and sample VI) with the space group  $Pbcm$ .

| Atom | Site | IV                        | V                         | VI                        |
|------|------|---------------------------|---------------------------|---------------------------|
| Fe1  | 4d   | (0.74985,0.36270,0.25)    | (0.74999,0.35843,0.25)    | (0.74998,0.35643,0.25)    |
| Fe2  | 8e   | (0.24974,0.11603,0.07154) | (0.24999,0.11357,0.07109) | (0.24979,0.11244,0.07105) |
| O1   | 4c   | (0.74946,0.25,0)          | (0.74998,0.25,0)          | (0.74986,0.25,0)          |
| O2   | 4d   | (0.24967,0.20465,0.25)    | (0.25009,0.20016,0.25)    | (0.24982,0.19803,0.25)    |
| O3   | 8e   | (0.24999,0.46650,0.11728) | (0.24990,0.46433,0.11889) | (0.25016,0.46335,0.11965) |

TABLE IV: Lattice constant ( $\text{\AA}$ ) of  $\text{Fe}_3\text{O}_4$  (sample VII, sample VIII, and sample IX) with the space group  $Bbmm$ .

| Sample | VII     | VIII    | IX      |
|--------|---------|---------|---------|
| $a$    | 8.98279 | 8.88086 | 8.84489 |
| $b$    | 9.04893 | 8.89412 | 8.85431 |
| $c$    | 2.54251 | 2.48289 | 2.46635 |

TABLE V: Atomic coordinates  $(x,y,z)$  of  $\text{Fe}_3\text{O}_4$  (sample VII, sample VIII, and sample IX) with the space group  $Bbmm$ .

| Atom | Site | VII                 | VIII                | IX                  |
|------|------|---------------------|---------------------|---------------------|
| Fe1  | 4c   | (0.38484,0.25,0)    | (0.38832,0.25,0)    | (0.38970,0.25,0)    |
| Fe2  | 8f   | (0.13324,0.07290,0) | (0.13493,0.07291,0) | (0.13553,0.07279,0) |
| O1   | 4c   | (0.04543,0.25,0)    | (0.04731,0.25,0)    | (0.04827,0.25,0)    |
| O2   | 8f   | (0.21872,0.61514,0) | (0.21718,0.61663,0) | (0.21656,0.61727,0) |
| O3   | 4a   | (0.5,0,0)           | (0.5,0,0)           | (0.5,0,0)           |

(a) up-spin

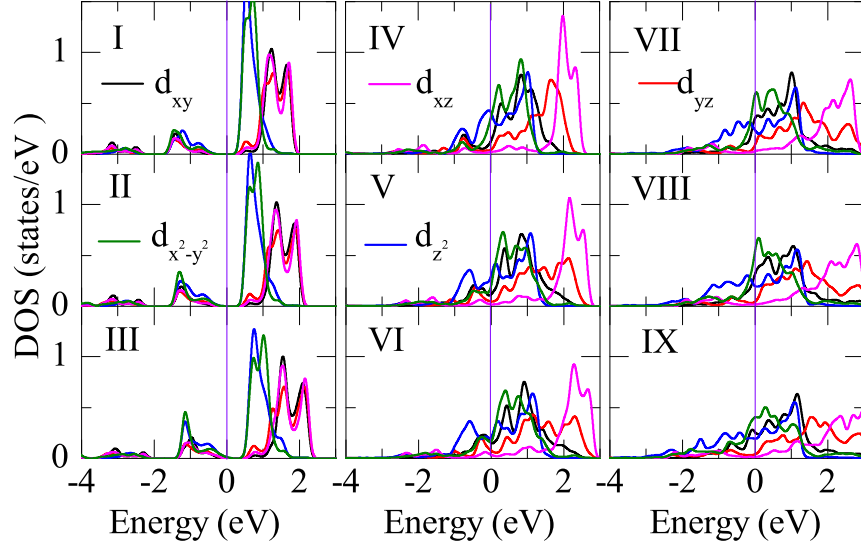

(b) down-spin

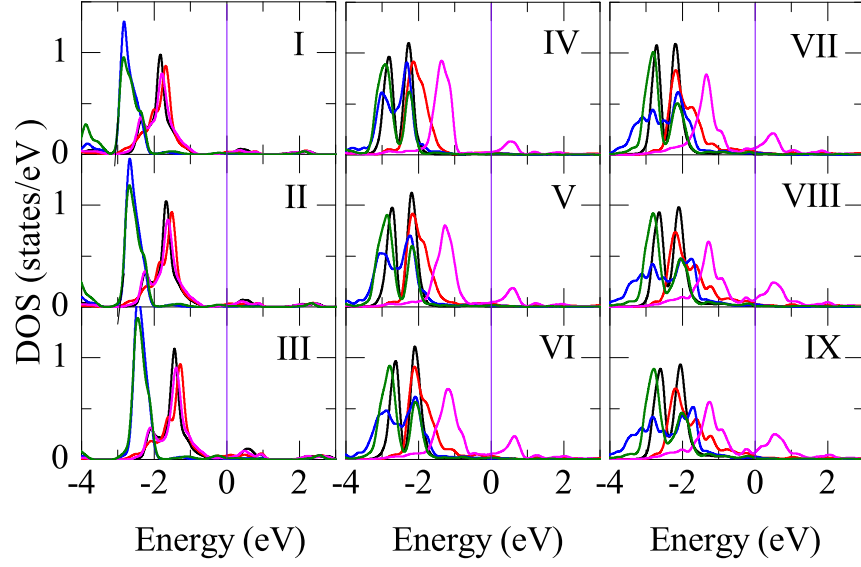

FIG. 1: 3d-orbital resolved local density of states of Fe ions at A-site for the nine typical samples.

(a) Up-spin channel. (b) Down-spin channel. The vertical line indicates the Fermi level.



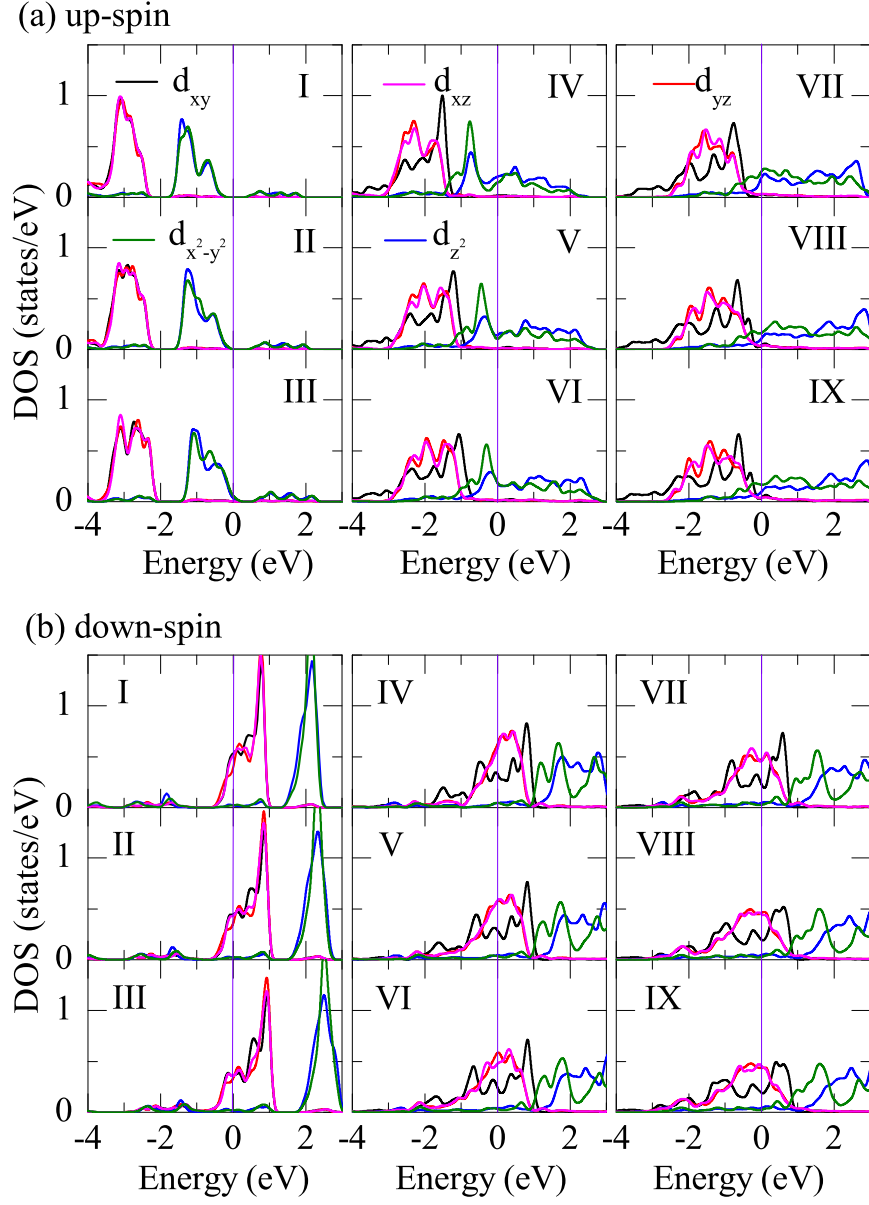

FIG. 2:  $3d$ -orbital resolved local density of states of Fe ions at B-site for the nine typical samples.

(a) Up-spin channel. (b) Down-spin channel. The vertical line indicates the Fermi level.
